# Supplementary material for: Facile synthesis of multi-phase (Si+SiO2)@C anode materials for lithium-ion batteries
Source: Royal Society of Chemistry journal article supplement (doi:10.1039/d3dt04075e), 2024-01-01
Supplement: d3dt04075e1.pdf [file d3dt04075e1.pdf]

## Facile synthesis of multi-phase (Si+SiO<sub>2</sub>) @C anode materials for Lithium-ion batteries

Shuai Wang<sup>1</sup>, Zhenfei Cai<sup>1</sup>, Rui Cao<sup>1</sup>, Ziyang Ma<sup>1</sup>, Qinyu Wu<sup>1</sup>, Muhmmad Moin<sup>1</sup>, Zishan Ahsan<sup>1</sup>, Yangzhou Ma<sup>1\*</sup>, Guangsheng Song<sup>1\*</sup>, Weidong Yang<sup>2</sup>, Cuie Wen<sup>3</sup>

<sup>1</sup> Key Laboratory of Green Fabrication and Surface Technology of Advanced Metal Materials, Ministry of Education, School of Materials Science and Engineering, Anhui University of Technology, Maanshan, 243000, China

<sup>2</sup> Future Manufacturing Flagship, Commonwealth Scientific and Industry Research Organization, Melbourne, Victoria 3168

<sup>3</sup> School of Engineering, RMIT University, Melbourne, Victoria 3001, Australia

The  $D_{Li^+}$  coefficient can be determined by the Warburg coefficient (S1)<sup>1</sup>:

$$D_{Li^+} = R^2 T^2 / (2 A^2 n^4 F^4 C^2 \sigma_\omega^2) \quad (S1)$$

Where R is the gas constant of 8.314J (mol/K), T is the temperature at which the sample was tested, A is the electrode area immersed in the electrolyte, n is the number of transferred electrons, F is the Faraday constant (96500 C/mol), and C is the molar concentration of Li<sup>+</sup> in the electrode.

It is apparent that the  $D_{Li^+}$  are only related to the Warburg coefficients ( $\omega$ ), which were determined from a linear fit to the low-frequency region:

$$Z' = R_e + R_{ct} + \sigma_\omega * \omega^{-0.5} \quad (S2)$$

The current response at a certain scan rate is evaluated by Eq. S3<sup>2</sup>:

$$i = a v^b \quad (S3)$$

Where a is a constant. b could be obtained by linear fitting the logarithm of the peak current and the logarithm of the corresponding scanning rate. According to the Conway theoretical equations (S3),

---

\* Corresponding authors: E-mail addresses: yangzhou.ma@outlook.com (Y.Z. Ma), song\_ahut@163.com (G.S. Song).

Values  $a$  and  $b$  are the regulation parameters, and the value of  $b$  is determined by a series of logarithmic fits of the peak currents, and when  $b = 0.5$ , the storage mechanism of lithium ions is the diffusion contribution, and when  $b = 1$ , it indicates that the storage mechanism of lithium ions is all capacity contribution

**Table 1. Comparison of electrochemical performance for various Si/SiO<sub>2</sub>-based anode materials reported recently.**

| Si anode materials                                                               | Synthesis method                                                           | current density (mA/g)   | N/capacity retention(%)              | ICE(%)       | Ref.             |
|----------------------------------------------------------------------------------|----------------------------------------------------------------------------|--------------------------|--------------------------------------|--------------|------------------|
| Si/SiO <sub>2</sub> @C composites                                                | ball milling+ magnesiothermic reduction+ C coating                         | 50                       | 50/59.6%                             | 56.7         | 3                |
| Si@SiO <sub>2</sub> @ amorphous-C                                                | ball milling+ magnesiothermic reduction                                    | 1000                     | 200/93.1%                            | 54%          | 4                |
| Si/SiO <sub>2</sub> coated with lignin-derived carbon (Si/SiO <sub>2</sub> @ALC) | magnesiothermic reduction                                                  | 200                      | 150/87.1%                            | 73.1         | 5                |
| Si-SiO <sub>2</sub> /carbon nanospheres composite                                | magnesiothermic reduction+template method + carbonthermal vapor deposition | 150                      | 200/96%                              | 64%          | 6                |
| Si@C@SiO <sub>2</sub>                                                            | template method+ liquid phase synthesis+coating                            | 200                      | 300/89.4%                            | 73.2         | 7                |
| Si@SiO <sub>2</sub> /C composite                                                 | wet chemistry+liquid phase coating                                         | 420                      | 200/70%                              | 61%          | 8                |
| Porous Si/SiO <sub>2</sub> /C                                                    | Dealloying+ solid state reaction                                           | 100                      | 100/51.2%                            | 53.4         | 9                |
| <b>SS50-900C</b>                                                                 | <b>Ball milling+carbonthermal vapor deposition</b>                         | <b>100</b><br><b>200</b> | <b>130/96.6%</b><br><b>280/79.5%</b> | <b>62.5%</b> | <b>This work</b> |

## References

- 1 S. Zhang, Q. Fan, Y. Liu, S. Xi, X. Liu, Z. Wu, J. Hao, W. K. Pang, T. Zhou and Z. Guo, *Advanced Materials*, 2020, **32**, 2000380.
- 2 D. Chao, P. Liang, Z. Chen, L. Bai, H. Shen, X. Liu, X. Xia, Y. Zhao, S. V. Savilov, J. Lin and Z. X. Shen, *ACS Nano*, 2016, **10**, 10211–10219.
- 3 Y. Zhou, Z. Tian, R. Fan, S. Zhao, R. Zhou, H. Guo and Z. Wang, *Powder Technology*, 2015, **284**, 365–370.
- 4 C.-H. Zheng, G.-P. Zhang, S.-S. Wang, A.-Q. Mao and D.-L. Fang, *Journal of Alloys and Compounds*, 2021, **875**, 159974.
- 5 W. Wu, M. Wang, J. Wang, C. Wang and Y. Deng, *ACS Appl. Energy Mater.*, 2020, **3**, 3884–3892.
- 6 Y. Du, M. Hou, D. Zhou, Y. Wang, C. Wang and Y. Xia, *Journal of Energy Chemistry*, 2014, **23**, 315–323.
- 7 T. Yang, X. Tian, X. Li, K. Wang, Z. Liu, Q. Guo and Y. Song, *Chemistry A European J*, 2017, **23**, 2165–2170.
- 8 D. Shen, C. Huang, L. Gan, J. Liu, Z. Gong and M. Long, *ACS Appl. Mater. Interfaces*, 2018, **10**, 7946–7954.
- 9 K. Wang, Y. Tan, P. Li, B. Xue and J. Sun, *ACS Appl. Mater. Interfaces*, 2019, **11**, 37732–37740.
